# Supplementary material for: Overexpression of tissue inhibitors of metalloproteinase 2 up-regulates NF-κB activity in melanoma cells
Source: PubMed Central journal article supplement (PMC2720935; doi:10.1186/1750-2187-4-4), 2009-07-23
Supplement: 1750-2187-4-4-S1.pdf [file 1750-2187-4-4-S1.pdf]

### IL-8 ELISA in cells with or without TNF

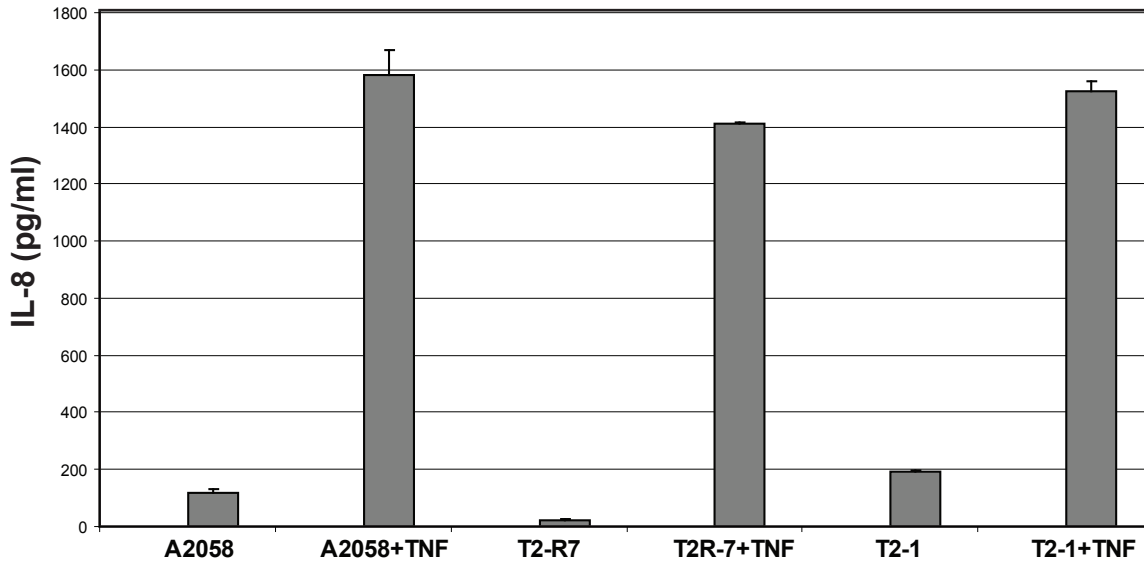

**Supplement data figure 1.** Equal number of cells was plated in 6-well plates. After growing for 24 hours, cells were stimulated with TNF for 6 hours. The supernatant was collected and assayed for IL-8 using the R&D Systems human IL-8 ELISA.
